# Supplementary material for: Functionalized nickel(ii)–iron(ii) dithiolates as biomimetic models of [NiFe]-H2ases
Source: Royal Society of Chemistry journal article supplement (doi:10.1039/d3dt00039g), 2023-01-01
Supplement: d3dt00039g1.pdf [file d3dt00039g1.pdf]

## Supporting Information

### Functionalized nickel(II)-iron(II) dithiolates as biomimetic models of [NiFe]-H<sub>2</sub>ases

Li-Cheng Song,\* Yin-Peng Wang, Yi-Xiong Dong and Xi-Yue Yang

#### Contents:

1. IR and <sup>1</sup>H (<sup>13</sup>C, <sup>31</sup>P) NMR spectra of [1](PF<sub>6</sub>)<sub>2</sub> (Fig. S1– Fig. S4)
2. In situ IR spectra showing the terminal CO changes of starting material [C](BF<sub>4</sub>)<sub>2</sub>, intermediate **m**<sub>2</sub> and product [3]BF<sub>4</sub> during reaction of [C](BF<sub>4</sub>)<sub>2</sub> with Me<sub>3</sub>NO in pyridine (Fig. S5).
3. IR and <sup>1</sup>H (<sup>13</sup>C, <sup>31</sup>P) NMR spectra of [2]PF<sub>6</sub> (Fig. S6– Fig. S9)
4. IR and <sup>1</sup>H (<sup>13</sup>C, <sup>31</sup>P) NMR spectra of [3]BF<sub>4</sub> (Fig. S10–Fig. S13)
5. Bulk electrolysis for the two-electron reduction of [CpFe(CO)<sub>2</sub>]<sub>2</sub> and the one-electron reduction of [2]PF<sub>6</sub> (Fig. S14)
6. Plots of *i*<sub>p</sub> versus *v*<sup>1/2</sup> for the reduction peaks of [2]PF<sub>6</sub> (Fig. S15)
7. In situ IR spectra showing the terminal CO changes of starting material [1](PF<sub>6</sub>)<sub>2</sub>, intermediate **m**<sub>3</sub> and product [4]PF<sub>6</sub> during reaction of [1](PF<sub>6</sub>)<sub>2</sub> with Me<sub>3</sub>NO and HCO<sub>2</sub>H in acetone (Fig. S16)
8. In situ IR spectra showing the terminal CO changes of starting material [1](PF<sub>6</sub>)<sub>2</sub>, intermediate **m**<sub>3</sub> and product [6]PF<sub>6</sub> during reaction of [1](PF<sub>6</sub>)<sub>2</sub> with Me<sub>3</sub>NO and PhCO<sub>2</sub>H in acetone (Fig. S17)
9. IR and <sup>1</sup>H (<sup>13</sup>C, <sup>31</sup>P) NMR spectra of [4]PF<sub>6</sub> (Fig. S18– Fig. S21)
10. IR and <sup>1</sup>H (<sup>13</sup>C, <sup>31</sup>P) NMR spectra of [5]PF<sub>6</sub> (Fig. S22– Fig. S25)
11. IR and <sup>1</sup>H (<sup>13</sup>C, <sup>31</sup>P) NMR spectra of [6]PF<sub>6</sub> (Fig. S26– Fig. S29)
12. IR and <sup>1</sup>H (<sup>13</sup>C, <sup>31</sup>P) NMR spectra of [7]PF<sub>6</sub> (Fig. S30– Fig. S33)
13. IR and <sup>1</sup>H (<sup>13</sup>C, <sup>31</sup>P) NMR spectra of [8]PF<sub>6</sub> (Fig. S34– Fig. S37)
14. IR and <sup>1</sup>H (<sup>13</sup>C, <sup>31</sup>P) NMR spectra of [9](PF<sub>6</sub>)<sub>2</sub> (Fig. S38– Fig. S41)
15. IR and <sup>1</sup>H (<sup>13</sup>C, <sup>31</sup>P) NMR spectra of [9](BF<sub>4</sub>)<sub>2</sub> (Fig. S42– Fig. S45)
16. References

1. IR and  $^1\text{H}$  ( $^{13}\text{C}$ ,  $^{31}\text{P}$ ) NMR spectra of  $[1](\text{PF}_6)_2$

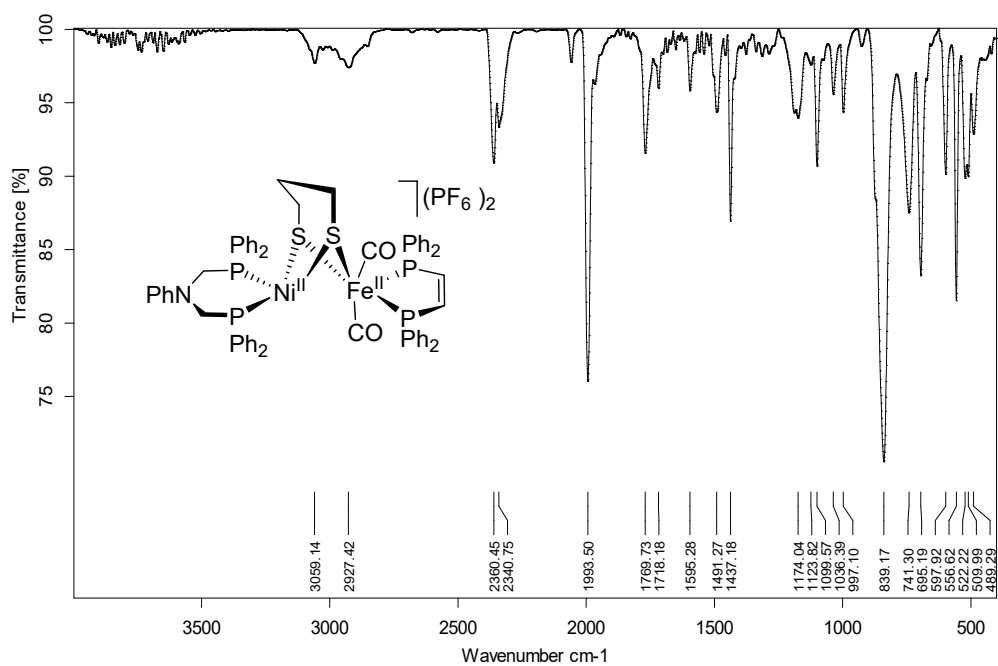

Fig. S1 IR spectrum of  $[1](\text{PF}_6)_2$

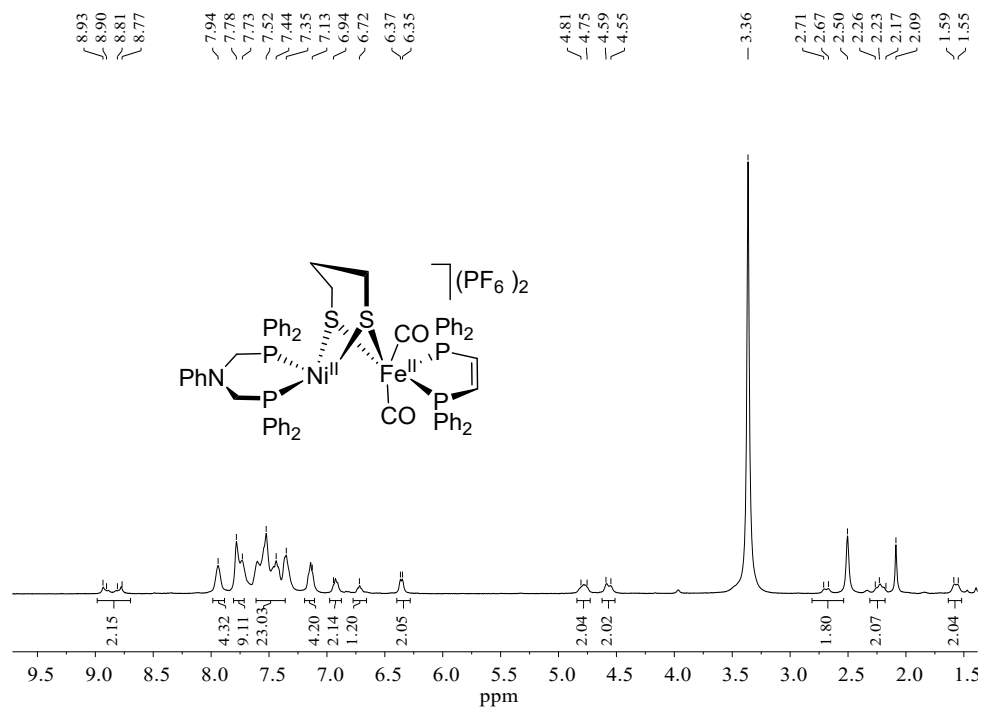

Fig. S2  $^1\text{H}$  NMR spectrum of  $[1](\text{PF}_6)_2$

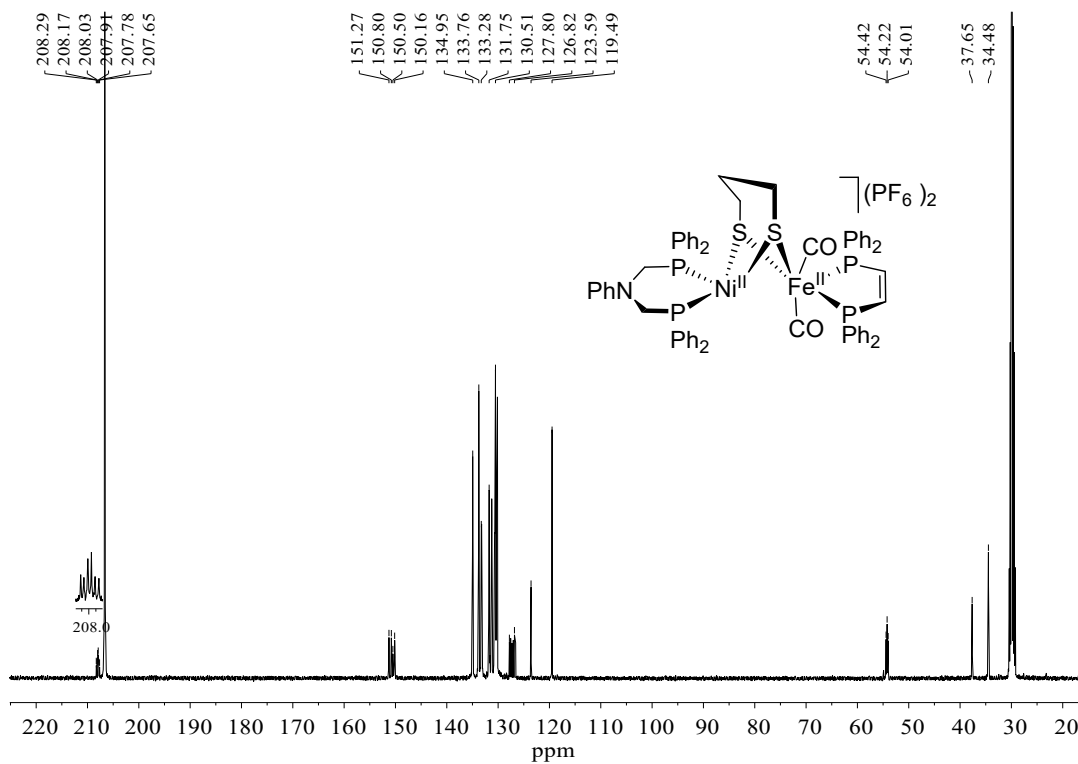

**Fig. S3**  $^{13}C$  NMR spectrum of  $[1](PF_6)_2$

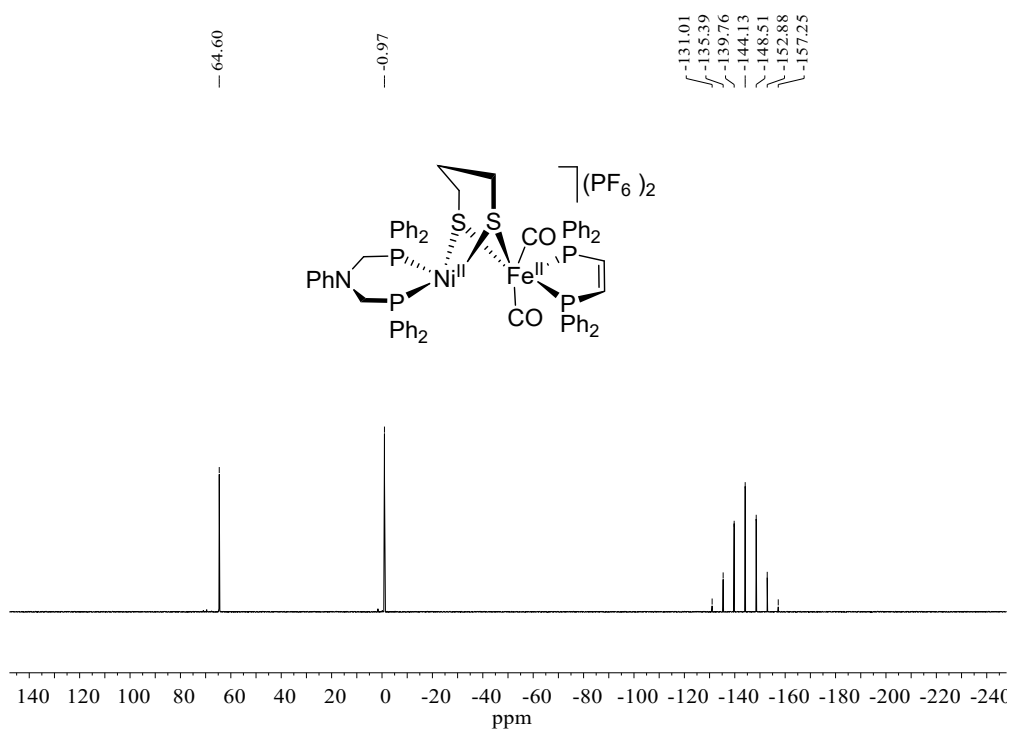

**Fig. S4**  $^{31}P$  NMR spectrum of  $[1](PF_6)_2$

2. In situ IR spectra showing the terminal CO changes of starting material  $[\text{C}](\text{BF}_4)_2$ , intermediate  $\mathbf{m}_2$  and product  $[\mathbf{3}]\text{BF}_4$  during reaction of  $[\text{C}](\text{BF}_4)_2$  with  $\text{Me}_3\text{NO}$  in pyridine.

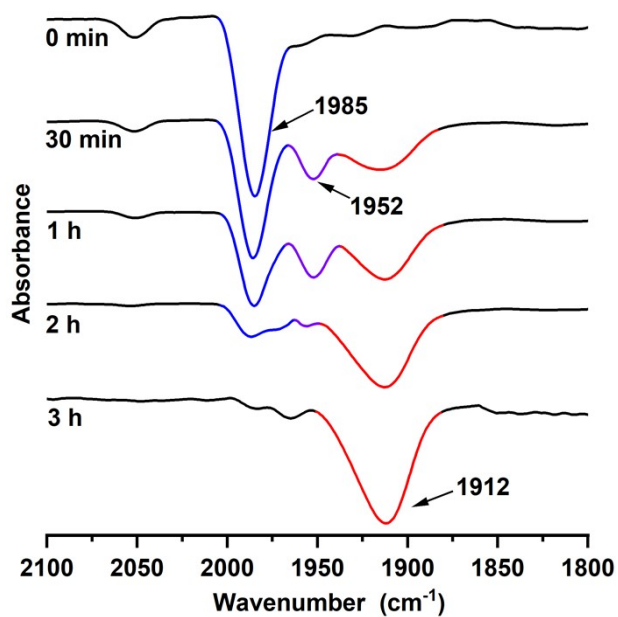

**Fig. S5** In situ IR spectra showing the terminal CO changes of starting material  $[\text{C}](\text{BF}_4)_2$ , intermediate  $\mathbf{m}_2$  and product  $[\mathbf{3}]\text{BF}_4$  during reaction of  $[\text{C}](\text{BF}_4)_2$  with  $\text{Me}_3\text{NO}$  in pyridine.

### 3. IR and $^1\text{H}$ ( $^{13}\text{C}$ , $^{31}\text{P}$ ) NMR spectra of $[\mathbf{2}]\text{PF}_6$

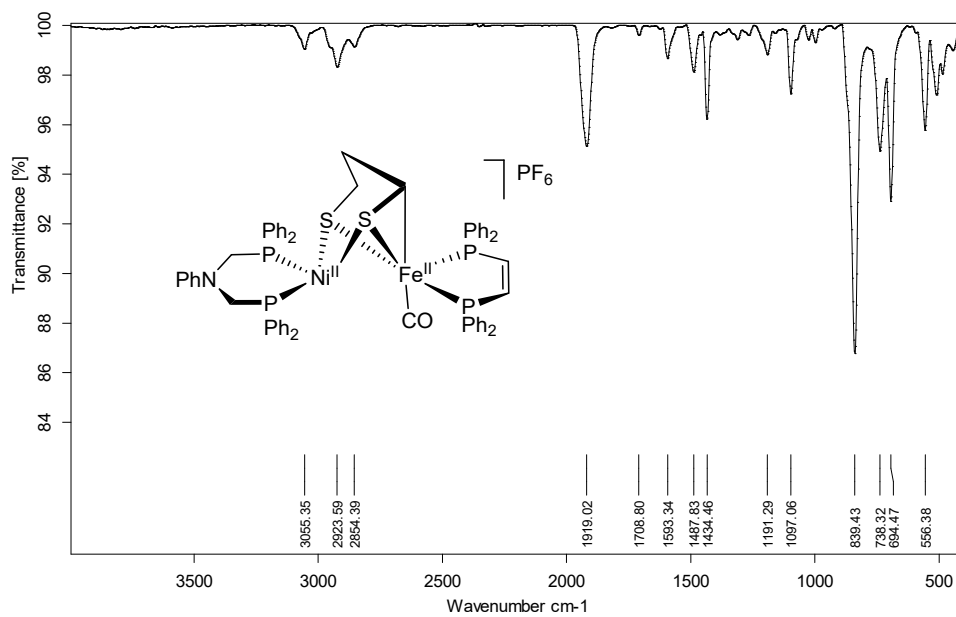

**Fig. S6** IR spectrum of  $[\mathbf{2}]\text{PF}_6$

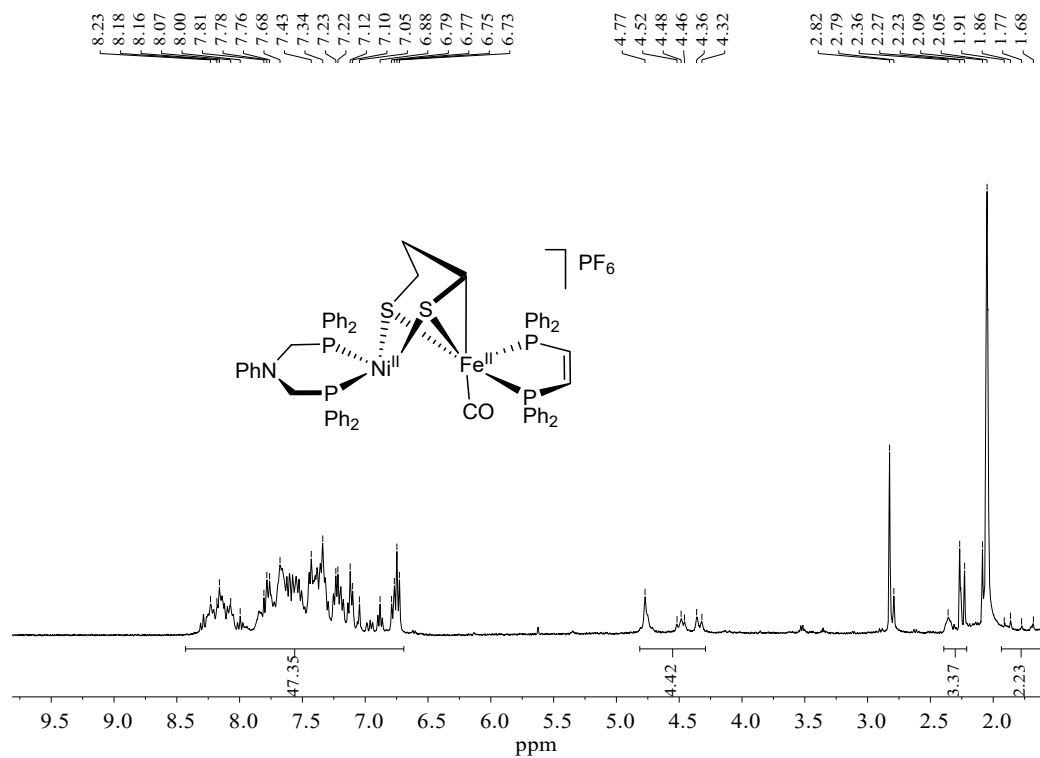

**Fig. S7**  $^1\text{H}$  NMR spectrum of  $[\mathbf{2}]\text{PF}_6$

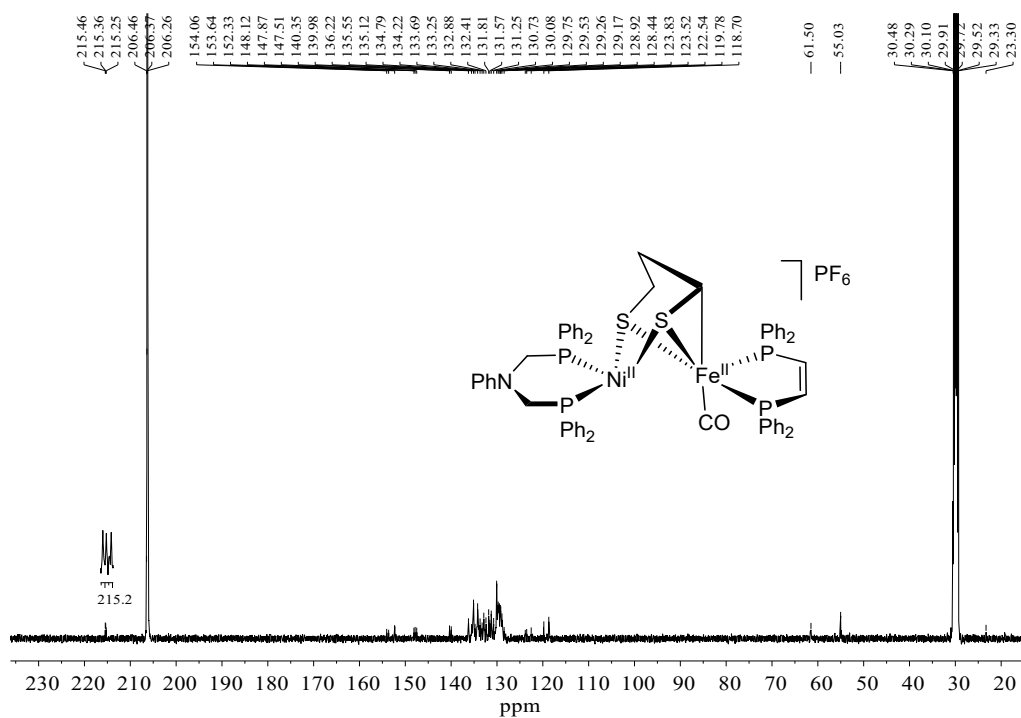

**Fig. S8** <sup>13</sup>C NMR spectrum of  $[2]PF_6$

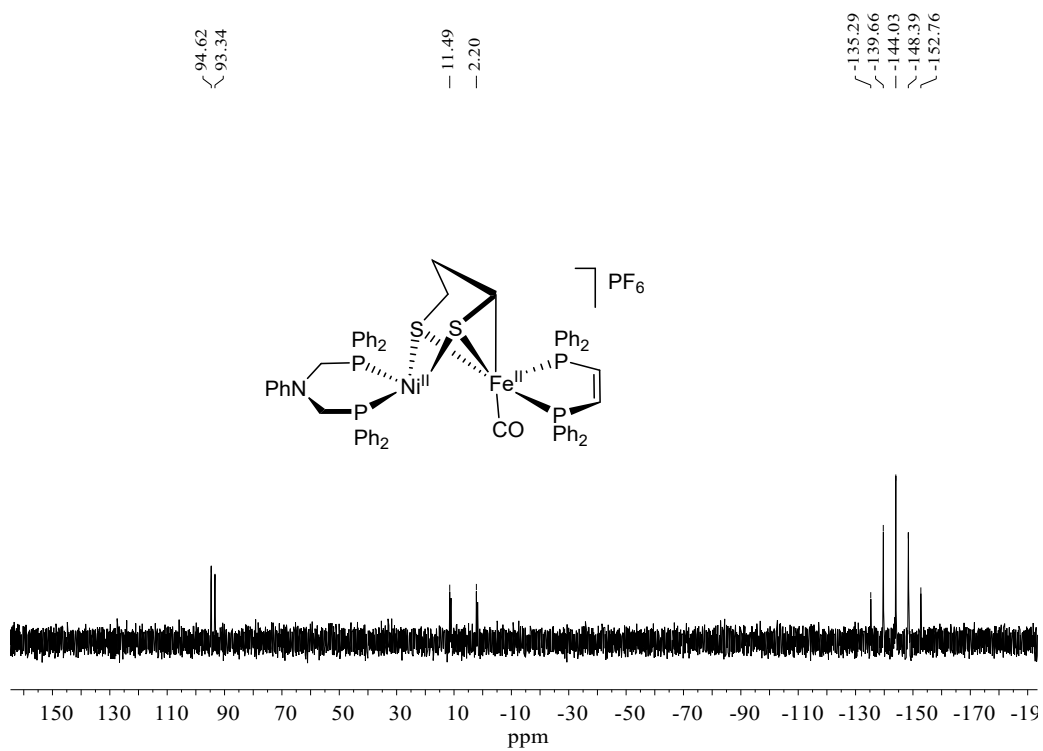

**Fig. S9** <sup>31</sup>P NMR spectrum of  $[2]PF_6$

#### 4. IR and $^1\text{H}$ ( $^{13}\text{C}$ , $^{31}\text{P}$ ) NMR spectra of $[\mathbf{3}]\text{BF}_4$

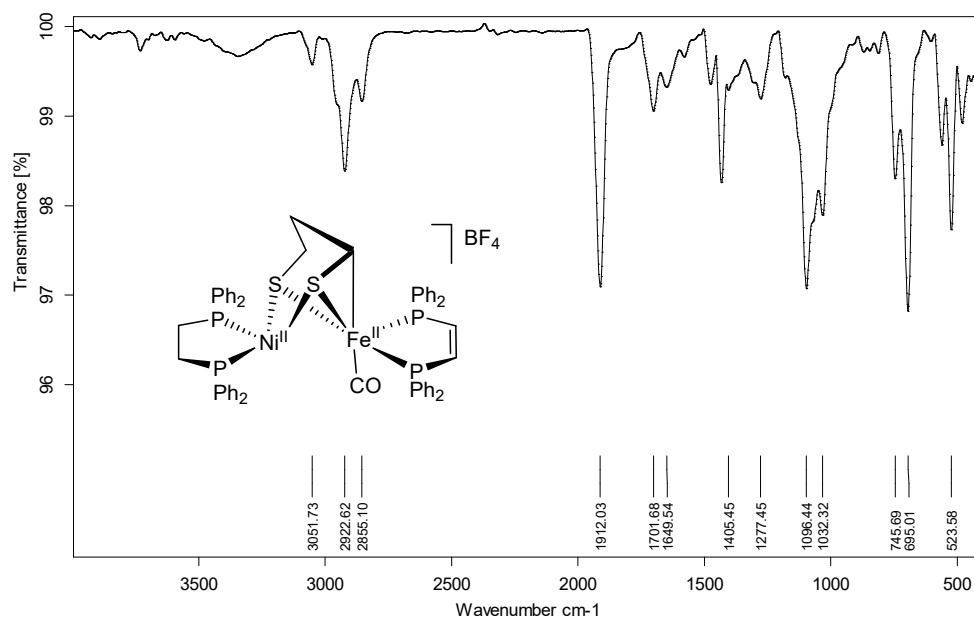

**Fig. S10** IR spectrum of  $[\mathbf{3}]\text{BF}_4$

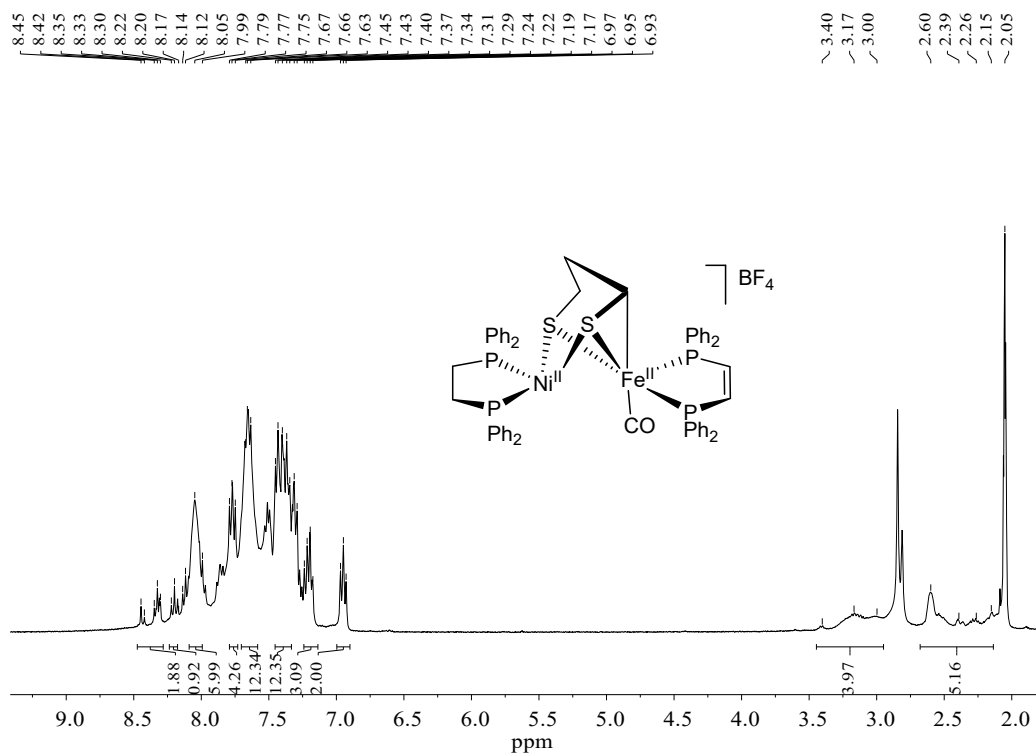

**Fig. S11**  $^1\text{H}$  NMR spectrum of  $[\mathbf{3}]\text{BF}_4$

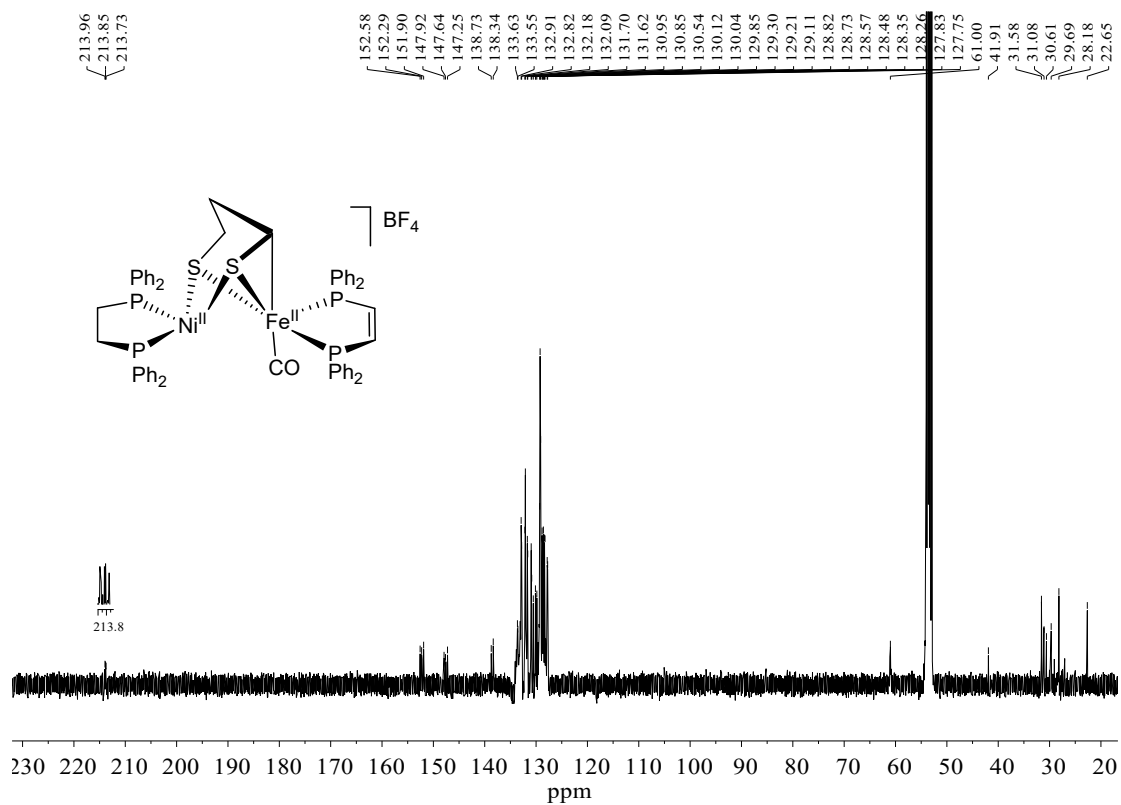

Fig. S12  $^{13}C$  NMR spectrum of  $[3]BF_4$

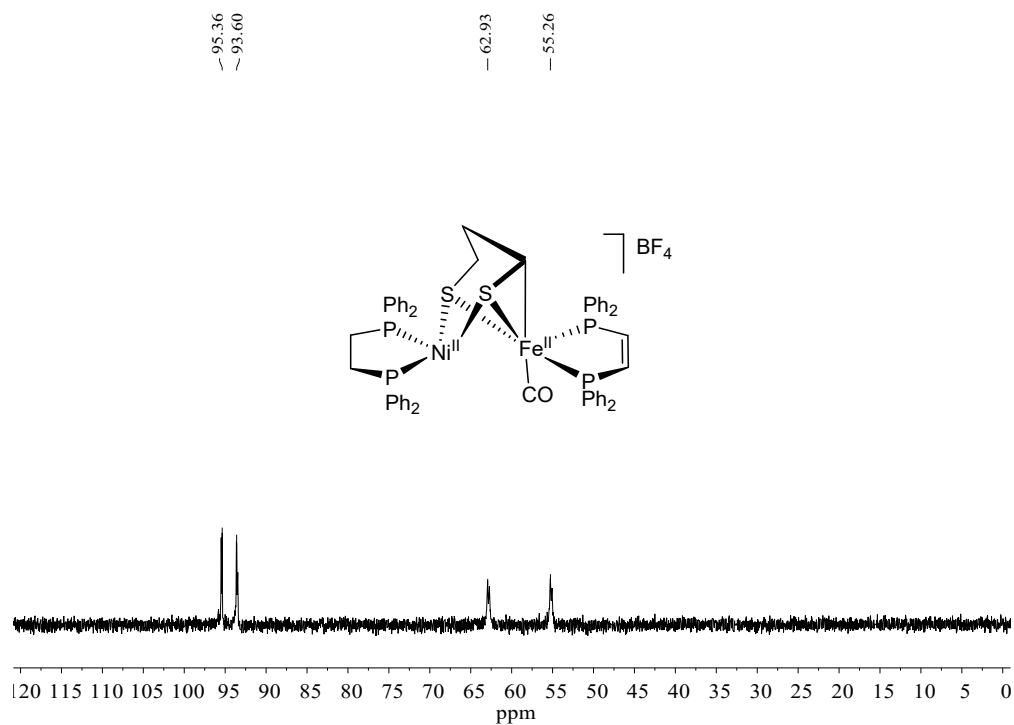

Fig. S13  $^{31}P$  NMR spectrum of  $[3]BF_4$



5. Bulk electrolysis for the two-electron reduction of  $[\text{CpFe}(\text{CO})_2]_2$  and the one-electron reduction of  $[\mathbf{2}]\text{PF}_6$

The reduction event for  $[\mathbf{2}]\text{PF}_6$  is a one-electron process since their final Q values determined by bulk electrolysis are close to half that of the known two-electron reduction process of dimer  $[\text{CpFe}(\text{CO})_2]_2$ .<sup>1,2</sup>

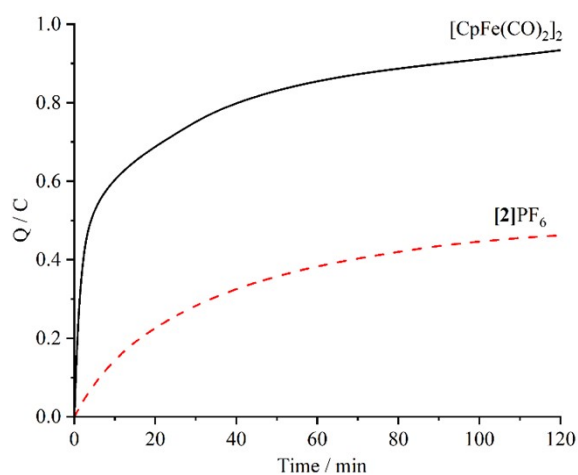

**Fig. S14** Bulk electrolysis for the two-electron reduction of  $[\text{CpFe}(\text{CO})_2]_2$  and the one-electron reductions for the first reduction event of  $[\mathbf{2}]\text{PF}_6$ .

6. Plots of  $i_p$  versus  $v^{1/2}$  for the reduction peaks of  $[\mathbf{2}]\text{PF}_6$

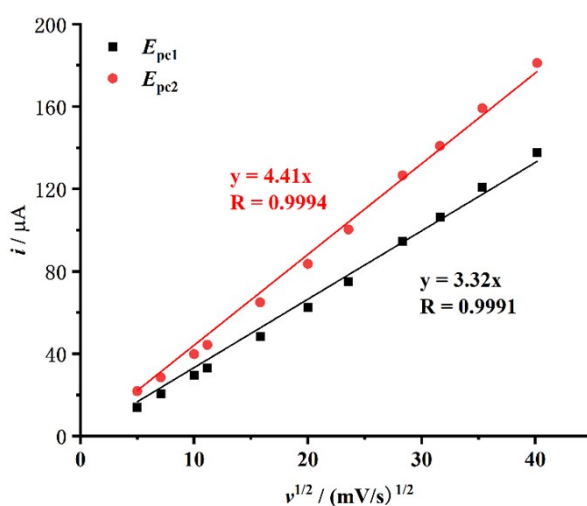

**Fig. S15** Plots of  $i_p$  versus  $v^{1/2}$  for the first and second reduction peaks of  $[\mathbf{2}]\text{PF}_6$  with their correlation coefficient R values.

7. In situ IR spectra showing the terminal CO changes of starting material  $[1](PF_6)_2$ , intermediate  $m_3$  and product  $[4]PF_6$  during reaction of  $[1](PF_6)_2$  with  $Me_3NO$  and  $HCO_2H$  in acetone.

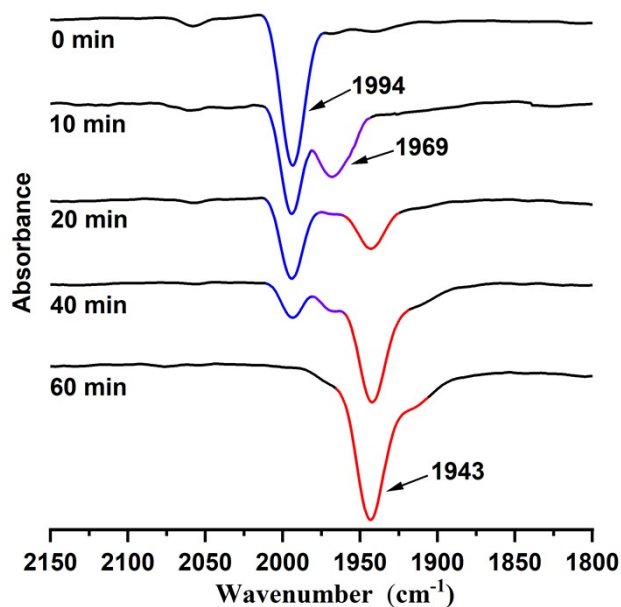

**Fig. S16** In situ IR spectra showing the terminal CO changes of starting material  $[1](PF_6)_2$ , intermediate  $m_3$  and product  $[4]PF_6$  during reaction of  $[1](PF_6)_2$  with  $Me_3NO$  and  $HCO_2H$  in acetone.

8. In situ IR spectra showing the terminal CO changes of starting material  $[1](PF_6)_2$ , intermediate  $m_3$  and product  $[6]PF_6$  during reaction of  $[1](PF_6)_2$  with  $Me_3NO$  and  $PhCO_2H$  in acetone.

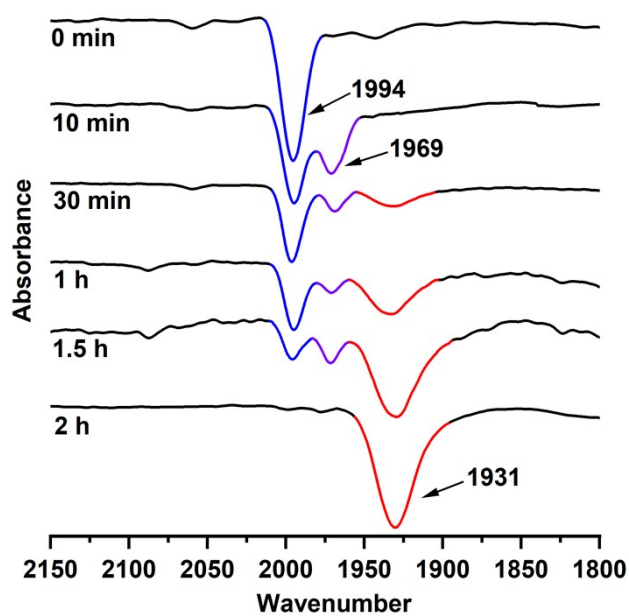

**Fig. S17** In situ IR spectra showing the terminal CO changes of starting material  $[1](PF_6)_2$ , intermediate  $m_3$  and product  $[6]PF_6$  during reaction of  $[1](PF_6)_2$  with  $Me_3NO$  and  $PhCO_2H$  in acetone.

9. IR and  $^1\text{H}$  ( $^{13}\text{C}$ ,  $^{31}\text{P}$ ) NMR spectra of  $[\mathbf{4}]\text{PF}_6$

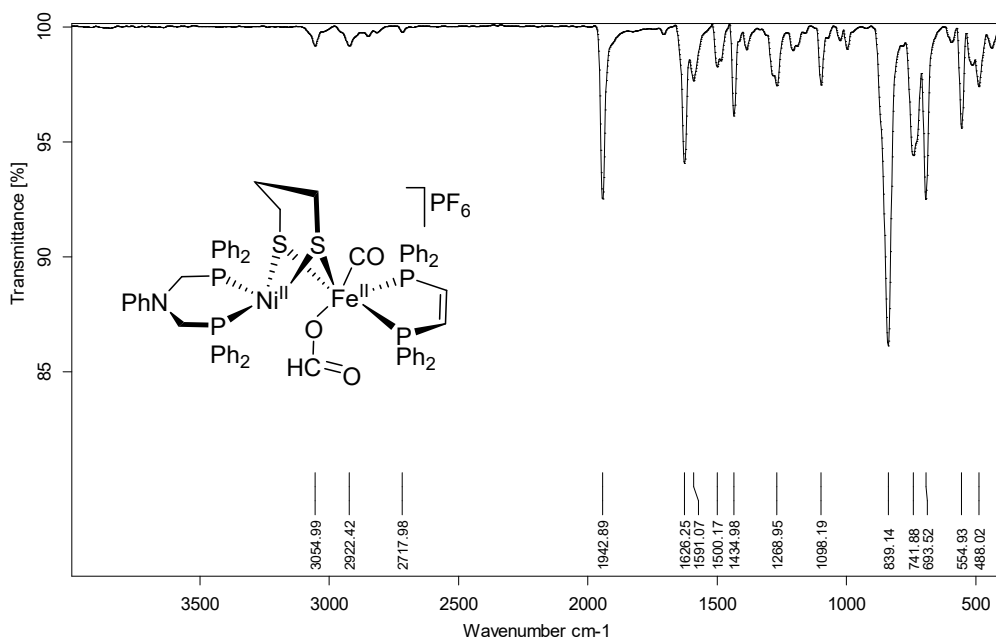

**Fig. S18** IR spectrum of  $[\mathbf{4}]\text{PF}_6$

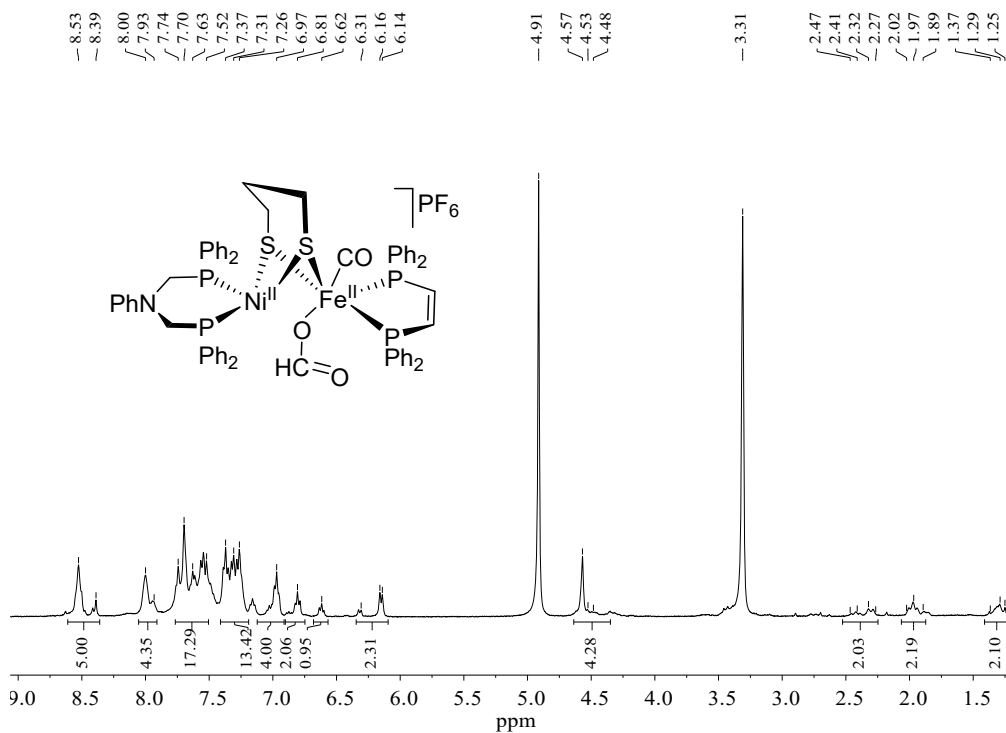

**Fig. S19**  $^1\text{H}$  NMR spectrum of  $[\mathbf{4}]\text{PF}_6$

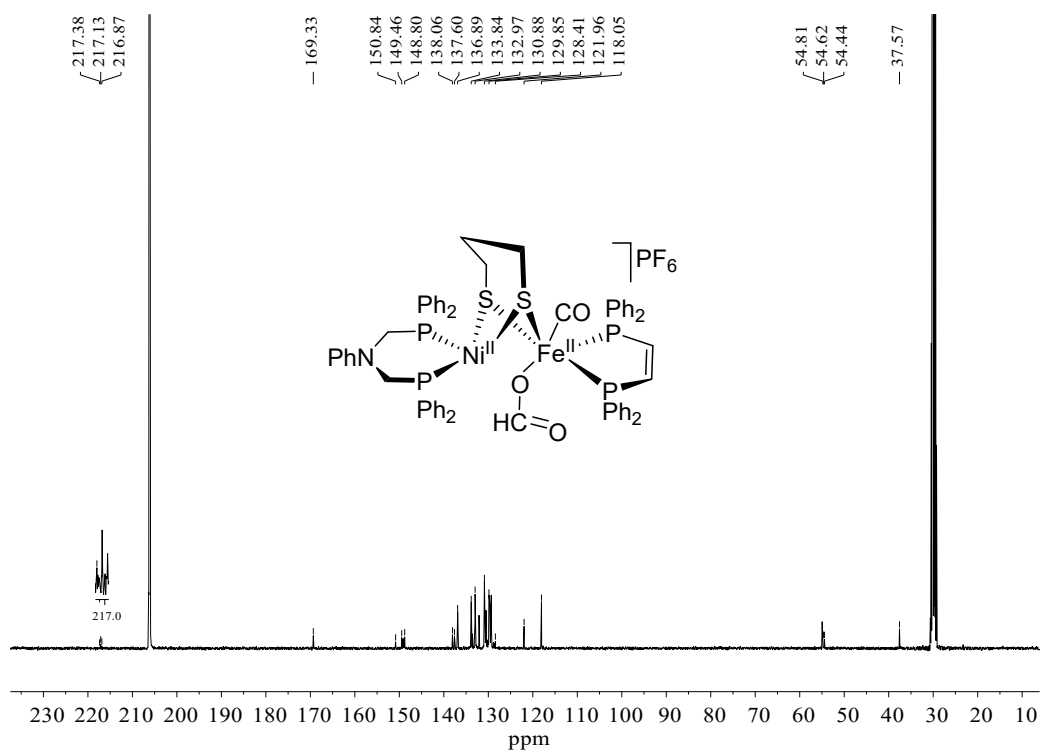

Fig. S20 <sup>13</sup>C NMR spectrum of [4]PF<sub>6</sub>

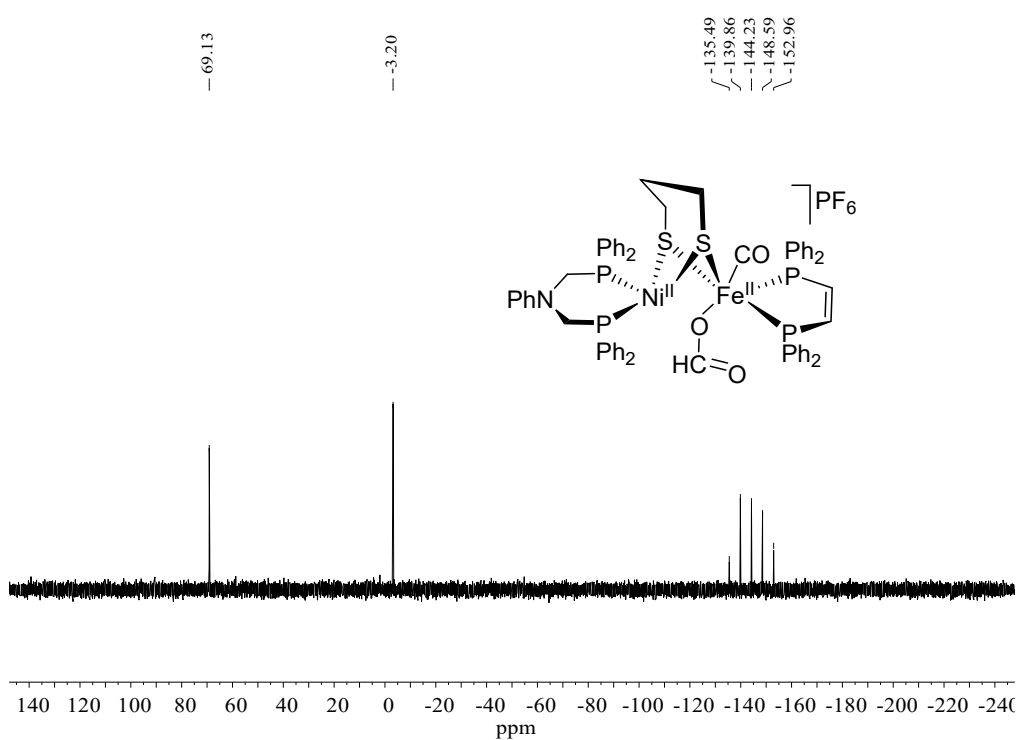

Fig. S21 <sup>31</sup>P NMR spectrum of [4]PF<sub>6</sub>

10. IR and  $^1\text{H}$  ( $^{13}\text{C}$ ,  $^{31}\text{P}$ ) NMR spectra of [5]PF<sub>6</sub>

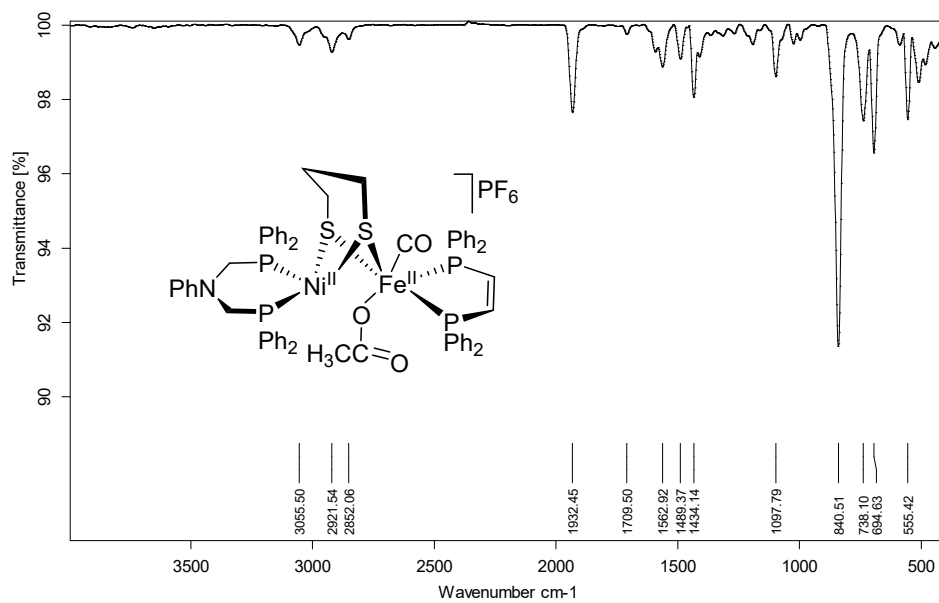

Fig. S22 IR spectrum of [5]PF<sub>6</sub>

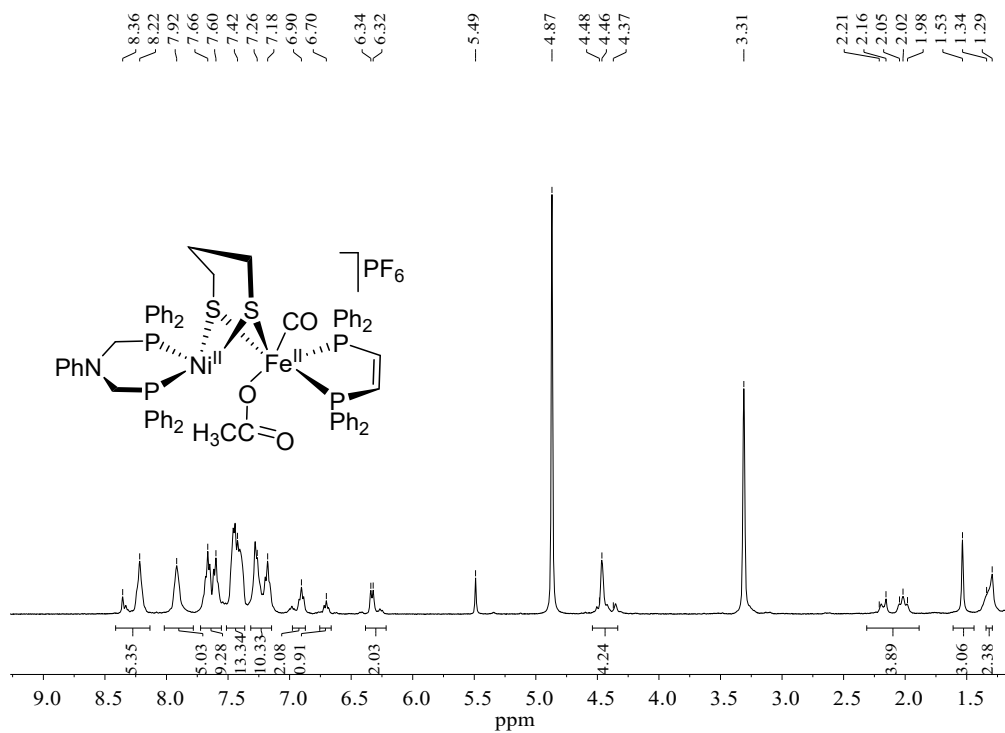

Fig. S23  $^1\text{H}$  NMR spectrum of [5]PF<sub>6</sub>

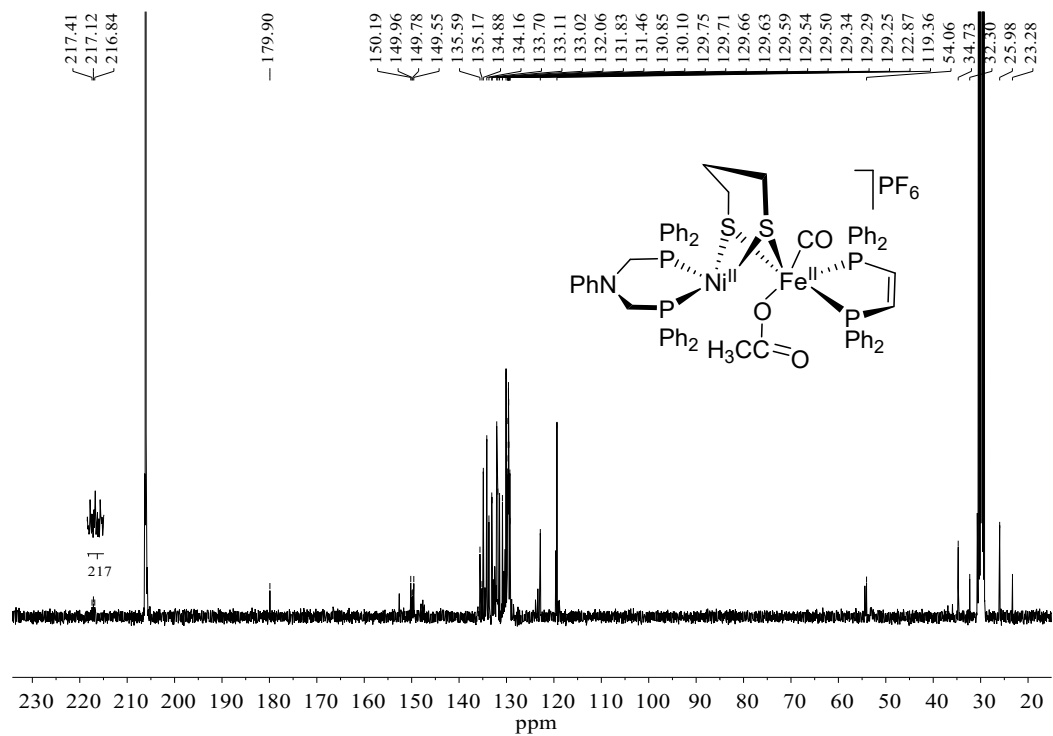

Fig. S24 <sup>13</sup>C NMR spectrum of [5]PF<sub>6</sub>

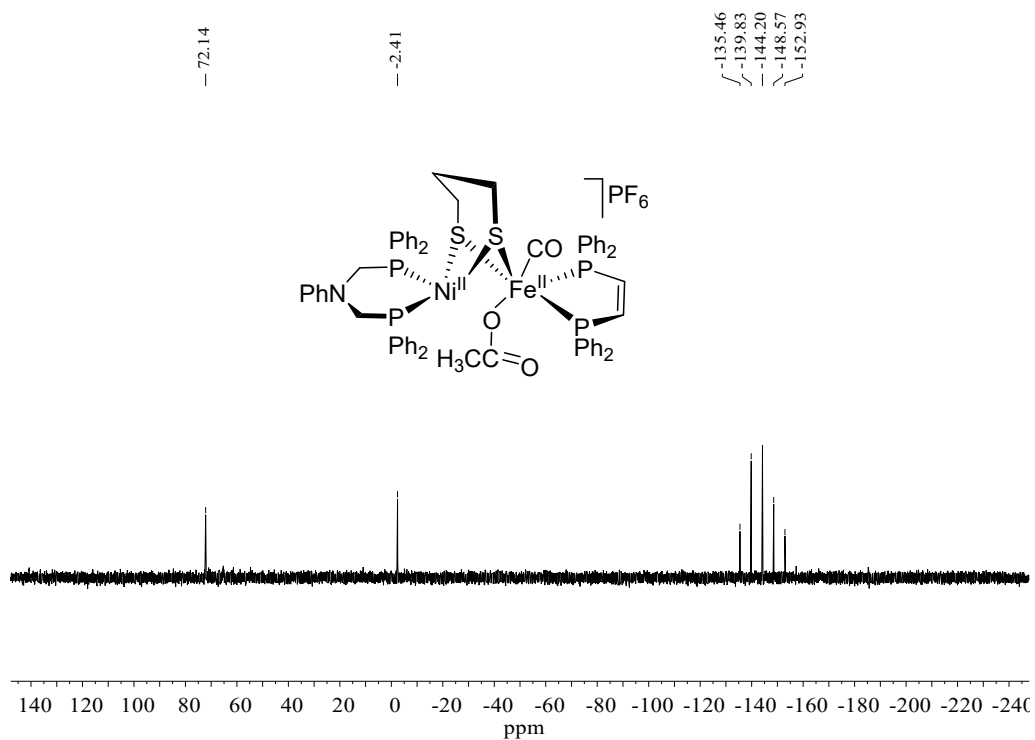

Fig. S25 <sup>31</sup>P NMR spectrum of [5]PF<sub>6</sub>

11. IR and  $^1\text{H}$  ( $^{13}\text{C}$ ,  $^{31}\text{P}$ ) NMR spectra of **[6]**PF<sub>6</sub>

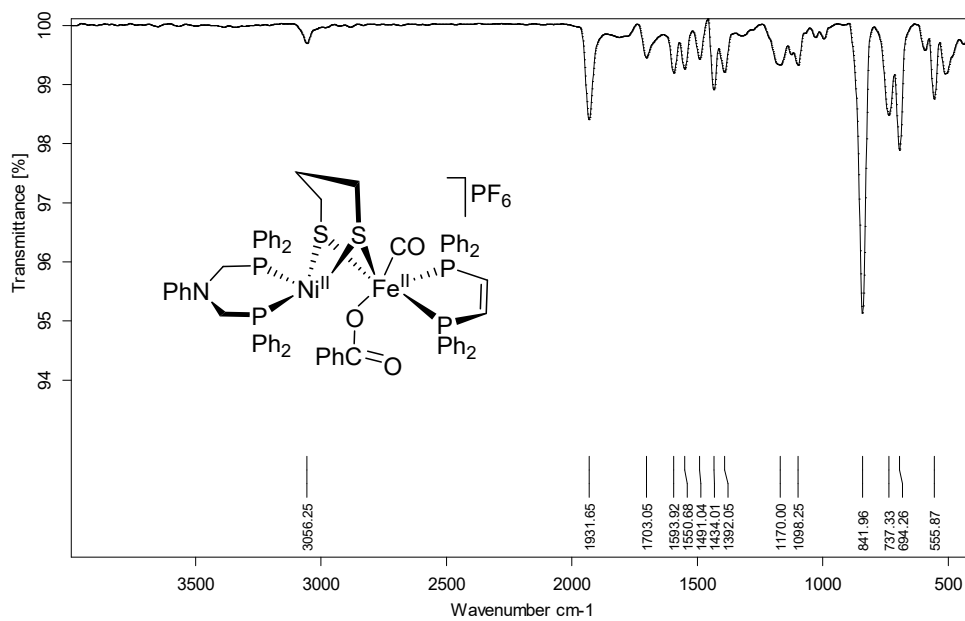

**Fig. S26** IR spectrum of **[6]**PF<sub>6</sub>

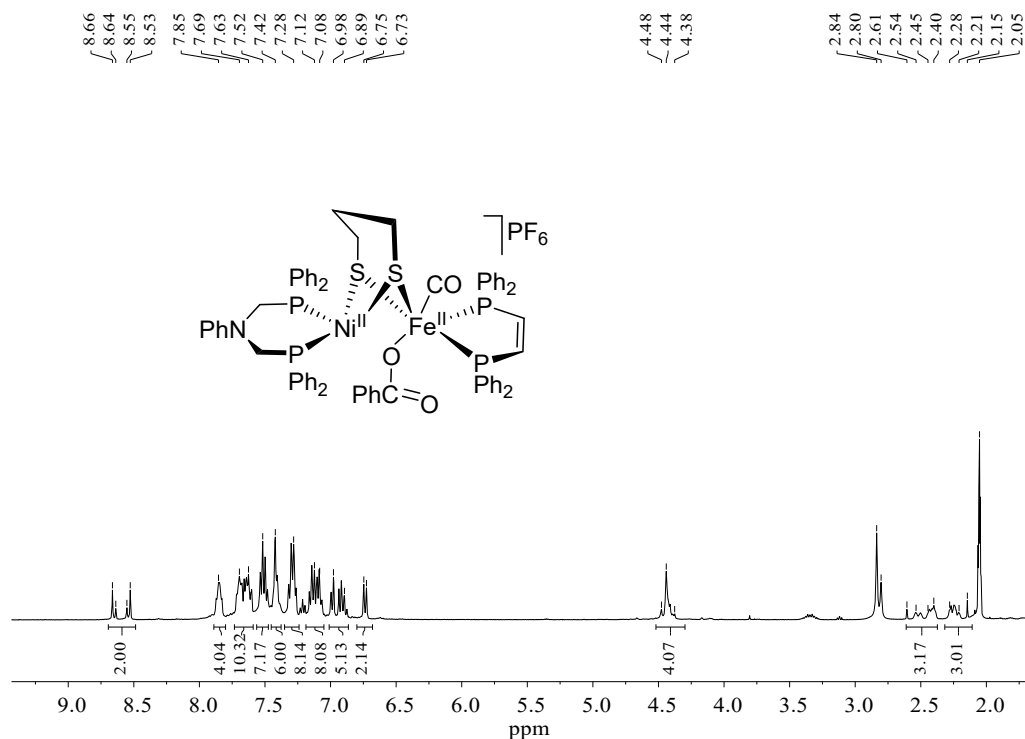

**Fig. S27**  $^1\text{H}$  NMR spectrum of **[6]**PF<sub>6</sub>



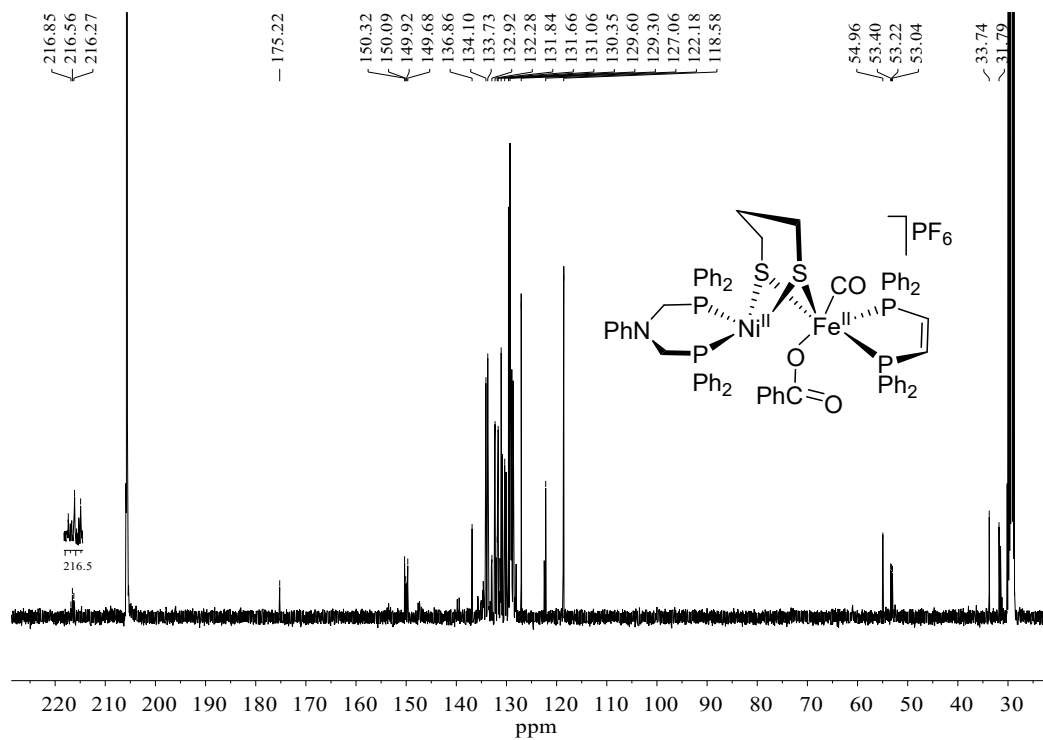

Fig. S28 <sup>13</sup>C NMR spectrum of [6]PF<sub>6</sub>

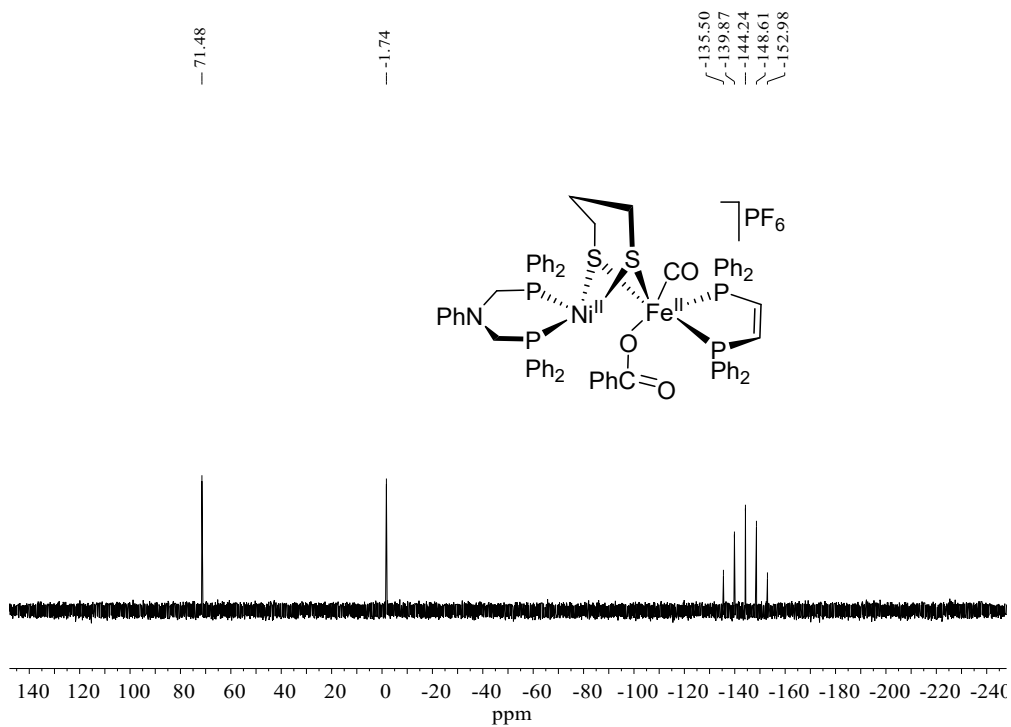

Fig. S29 <sup>31</sup>P NMR spectrum of [6]PF<sub>6</sub>

12. IR and  $^1\text{H}$  ( $^{13}\text{C}$ ,  $^{31}\text{P}$ ) NMR spectra of  $[\mathbf{7}]\text{PF}_6$

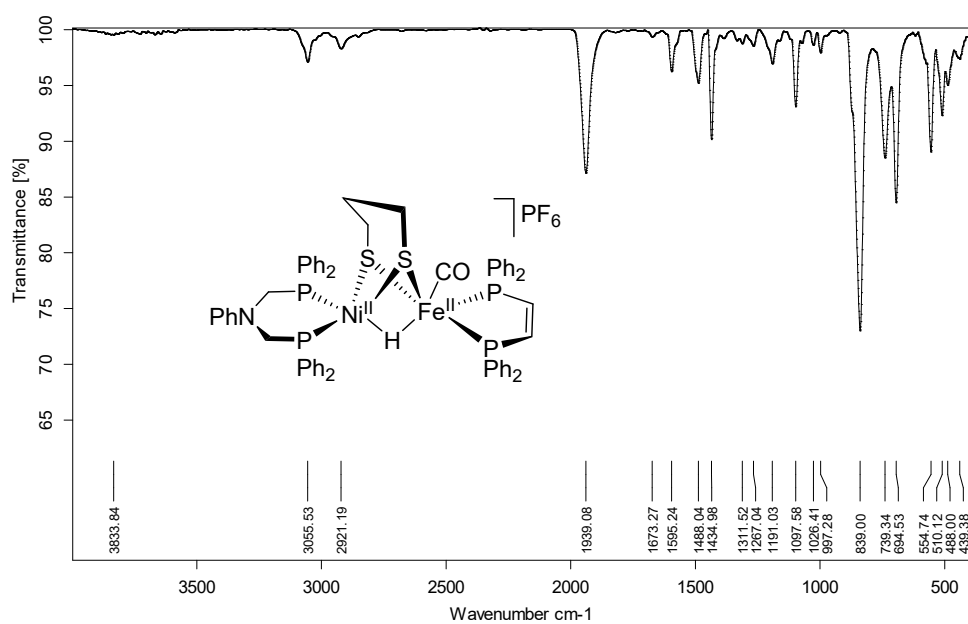

Fig. S30 IR spectrum of  $[\mathbf{7}]\text{PF}_6$

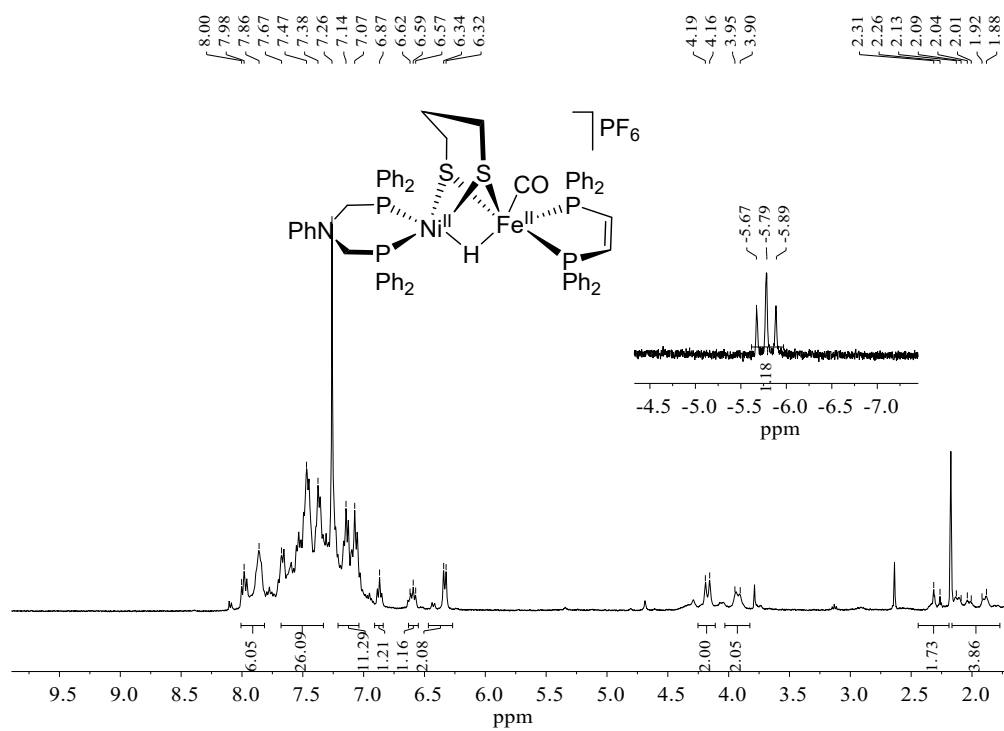

Fig. S31  $^1\text{H}$  NMR spectrum of  $[\mathbf{7}]\text{PF}_6$

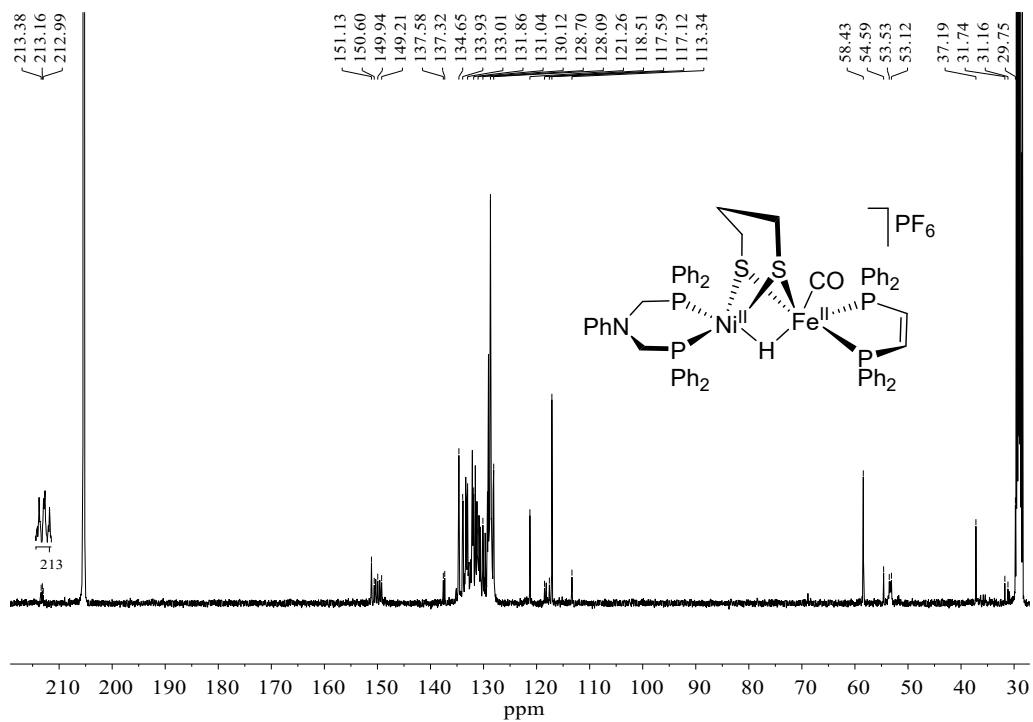

Fig. S32 <sup>13</sup>C NMR spectrum of [7]PF<sub>6</sub>

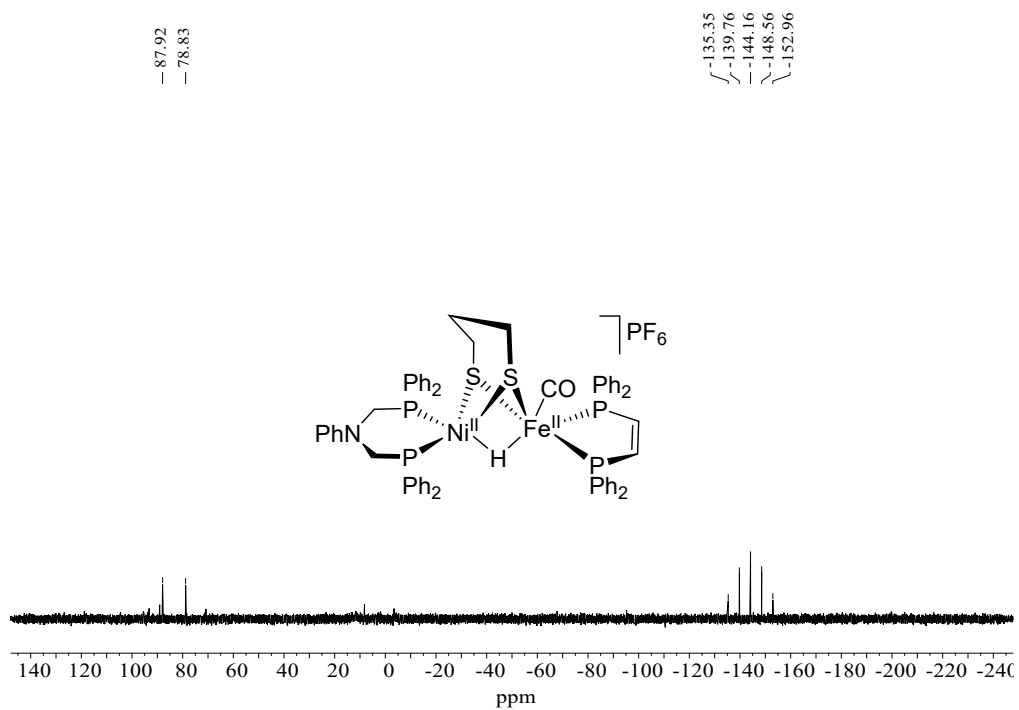

Fig. S33 <sup>31</sup>P NMR spectrum of [7]PF<sub>6</sub>

13. IR and  $^1\text{H}$  ( $^{13}\text{C}$ ,  $^{31}\text{P}$ ) NMR spectra of **[8]**PF<sub>6</sub>

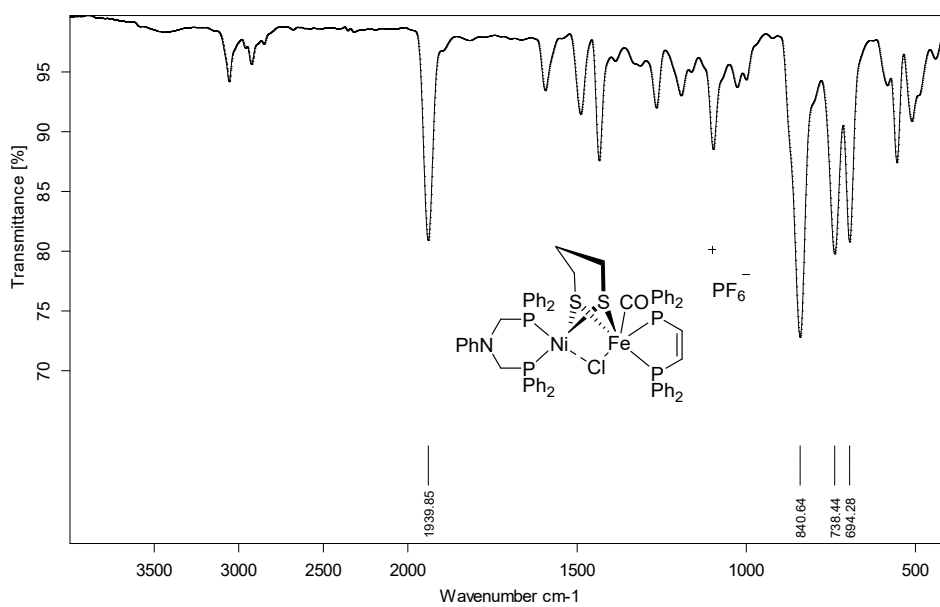

**Fig. S34** IR spectrum of **[8]**PF<sub>6</sub>

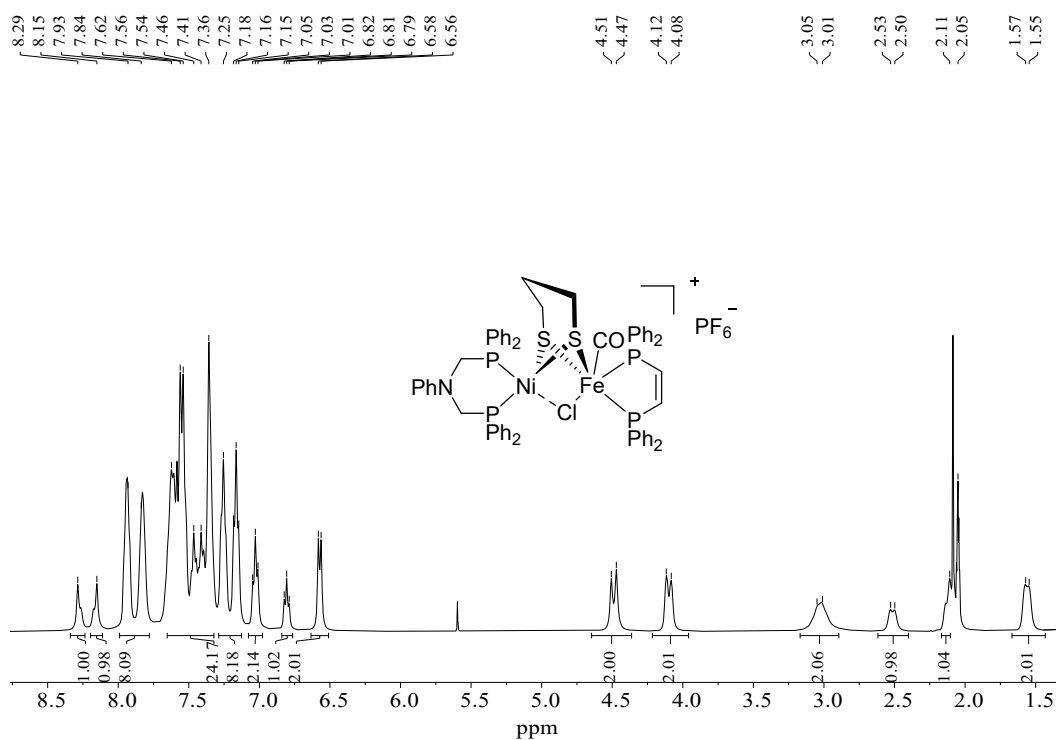

**Fig. S35**  $^1\text{H}$  NMR spectrum of **[8]**PF<sub>6</sub>

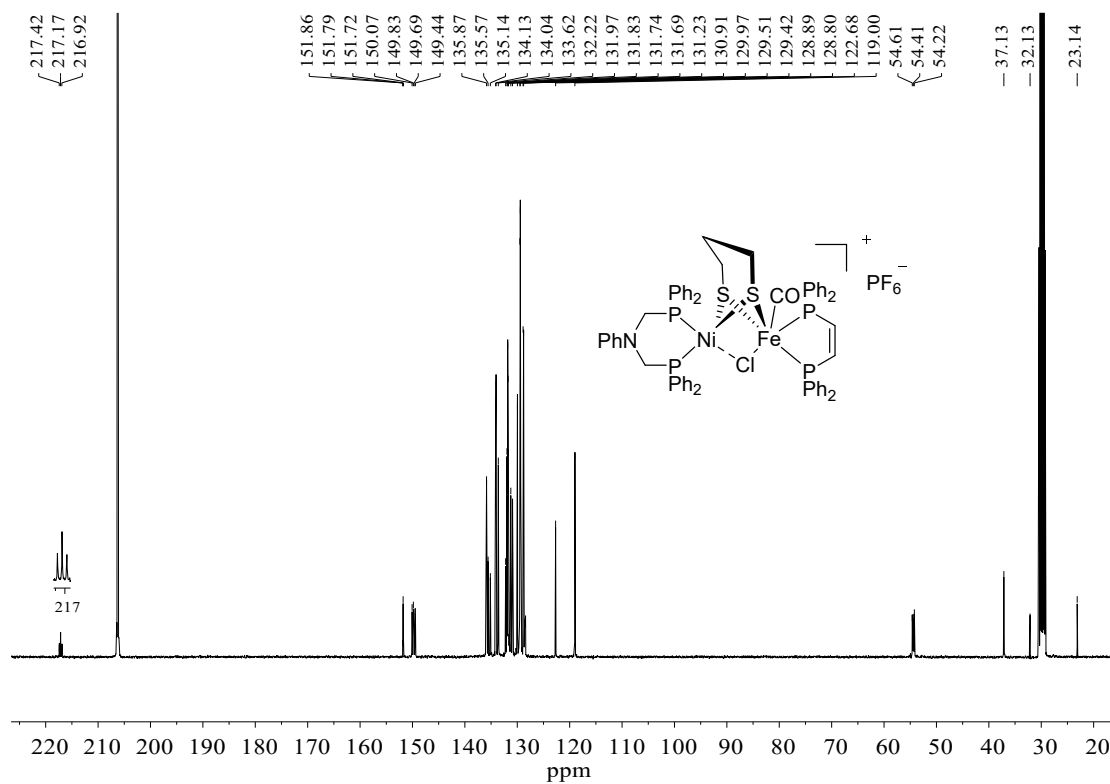

Fig. S36 <sup>13</sup>C NMR spectrum of [8]PF<sub>6</sub>

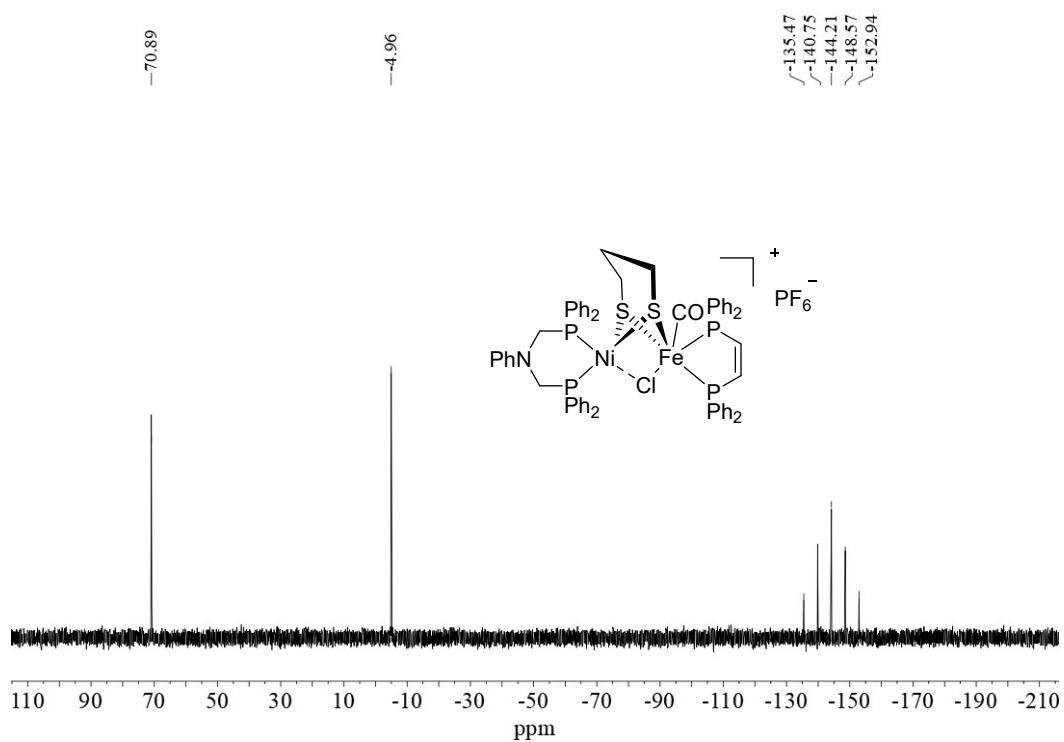

Fig. S37 <sup>31</sup>P NMR spectrum of [8]PF<sub>6</sub>

14. IR and  $^1\text{H}$  ( $^{13}\text{C}$ ,  $^{31}\text{P}$ ) NMR spectra of  $[\mathbf{9}](\text{PF}_6)_2$

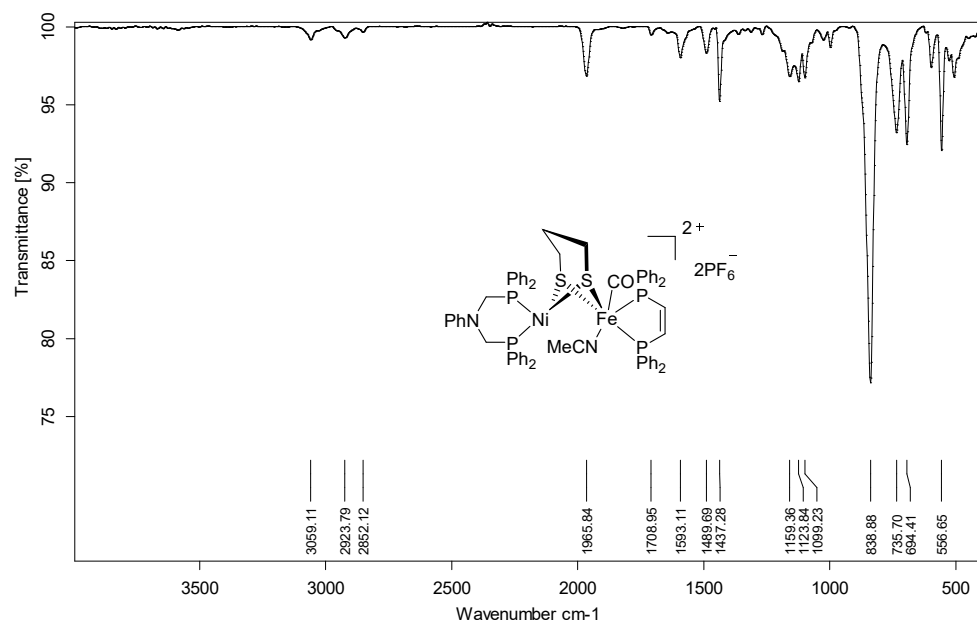

Fig. S38 IR spectrum of  $[\mathbf{9}](\text{PF}_6)_2$

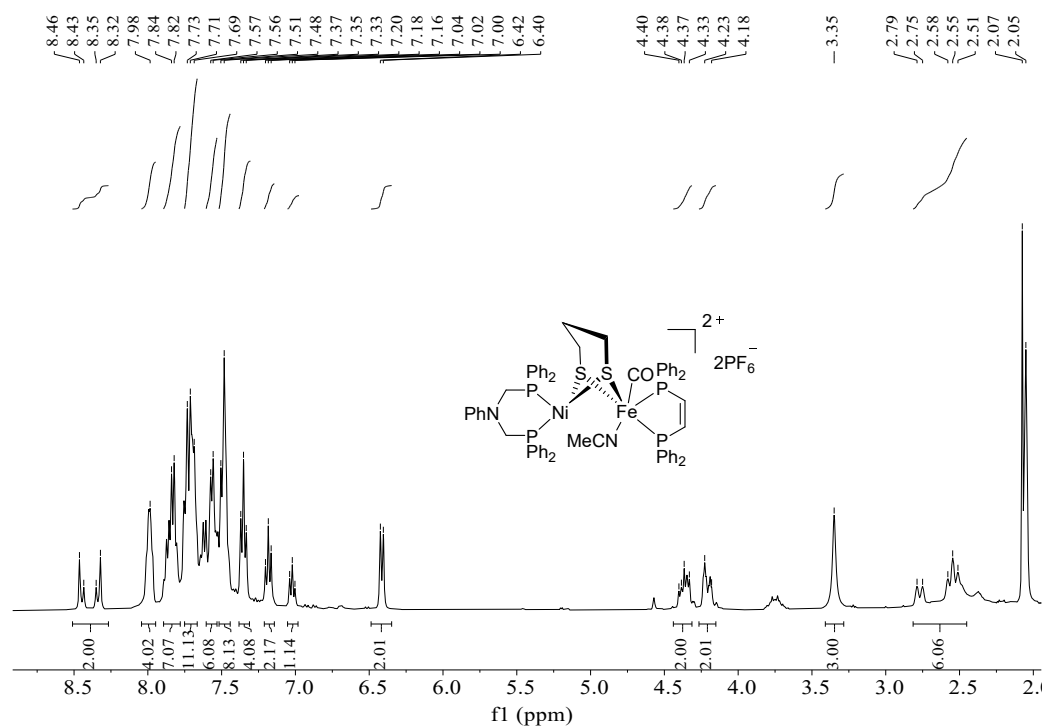

Fig. S39  $^1\text{H}$  NMR spectrum of  $[\mathbf{9}](\text{PF}_6)_2$

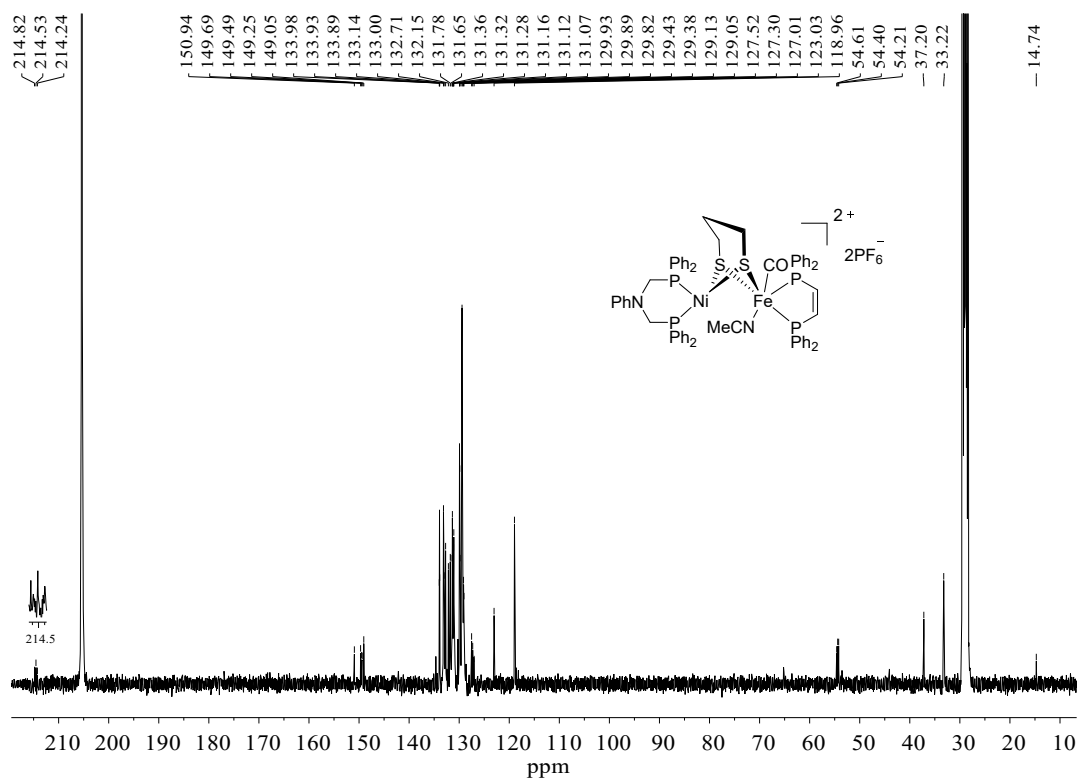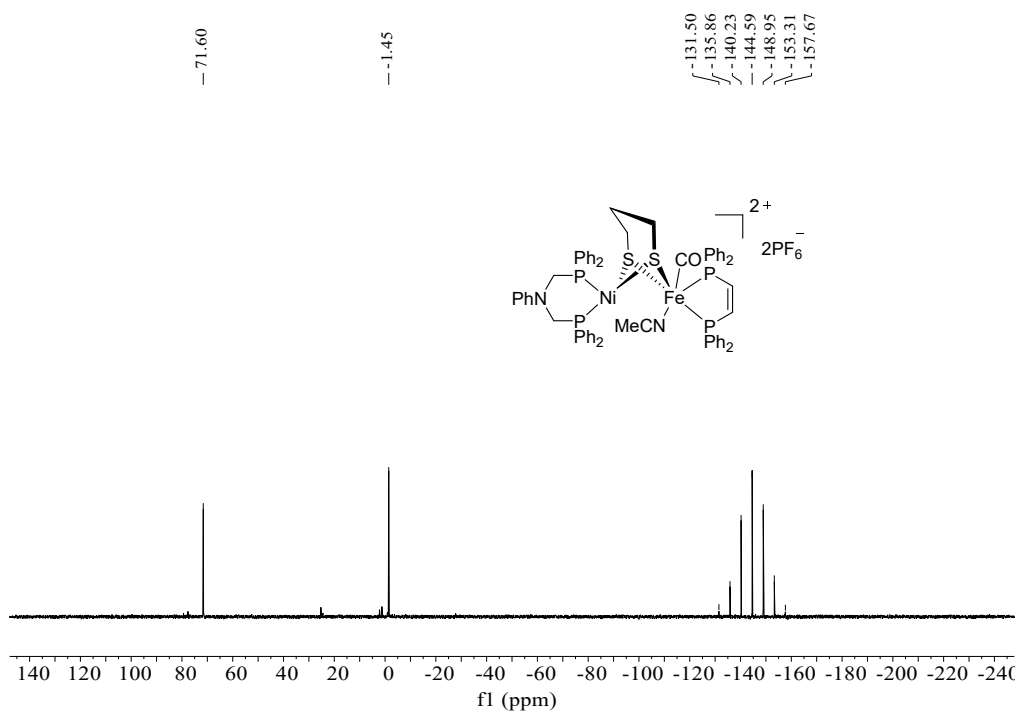

15. IR and  $^1\text{H}$  ( $^{13}\text{C}$ ,  $^{31}\text{P}$ ) NMR spectra of  $[\mathbf{9}](\text{BF}_4)_2$

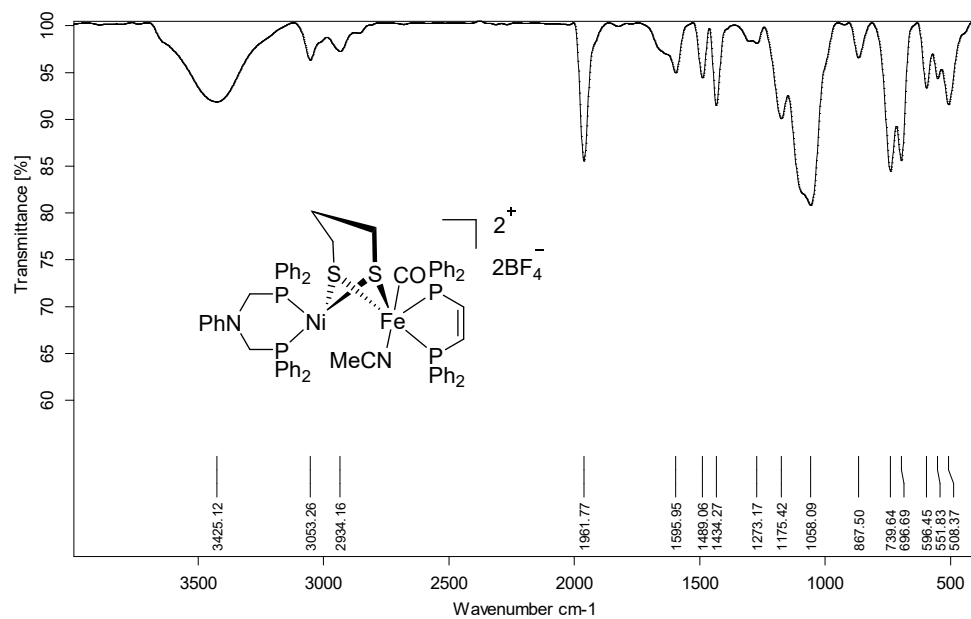

Fig. S42 IR spectrum of  $[\mathbf{9}](\text{BF}_4)_2$

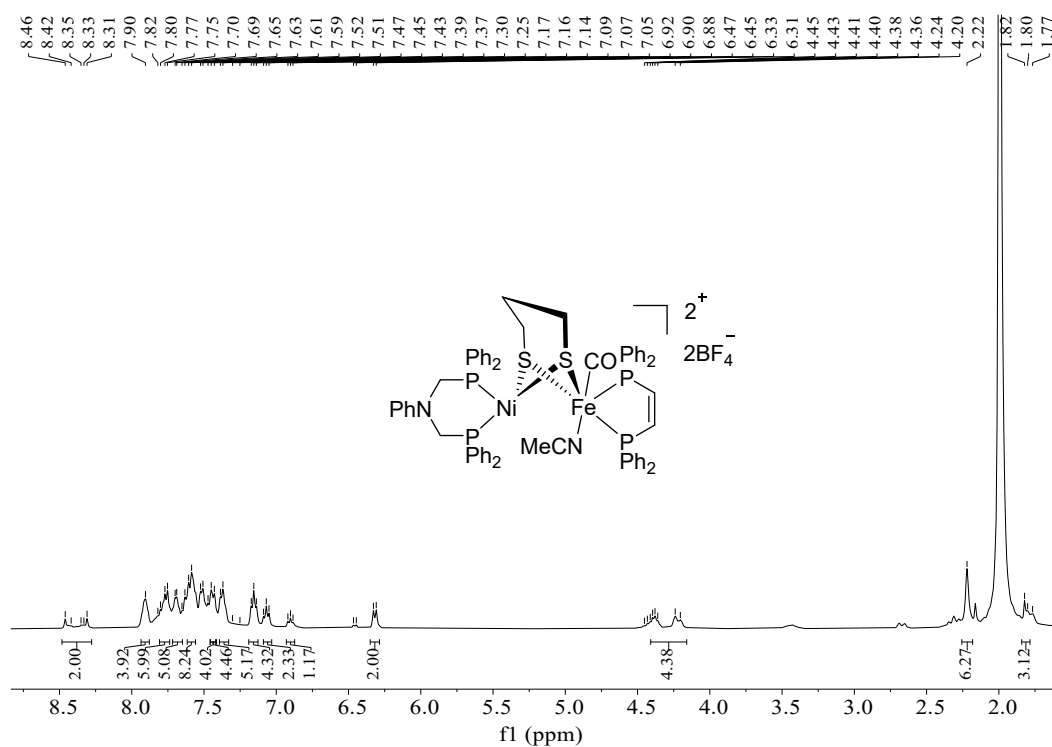

Fig. S43  $^1\text{H}$  NMR spectrum of  $[\mathbf{9}](\text{BF}_4)_2$



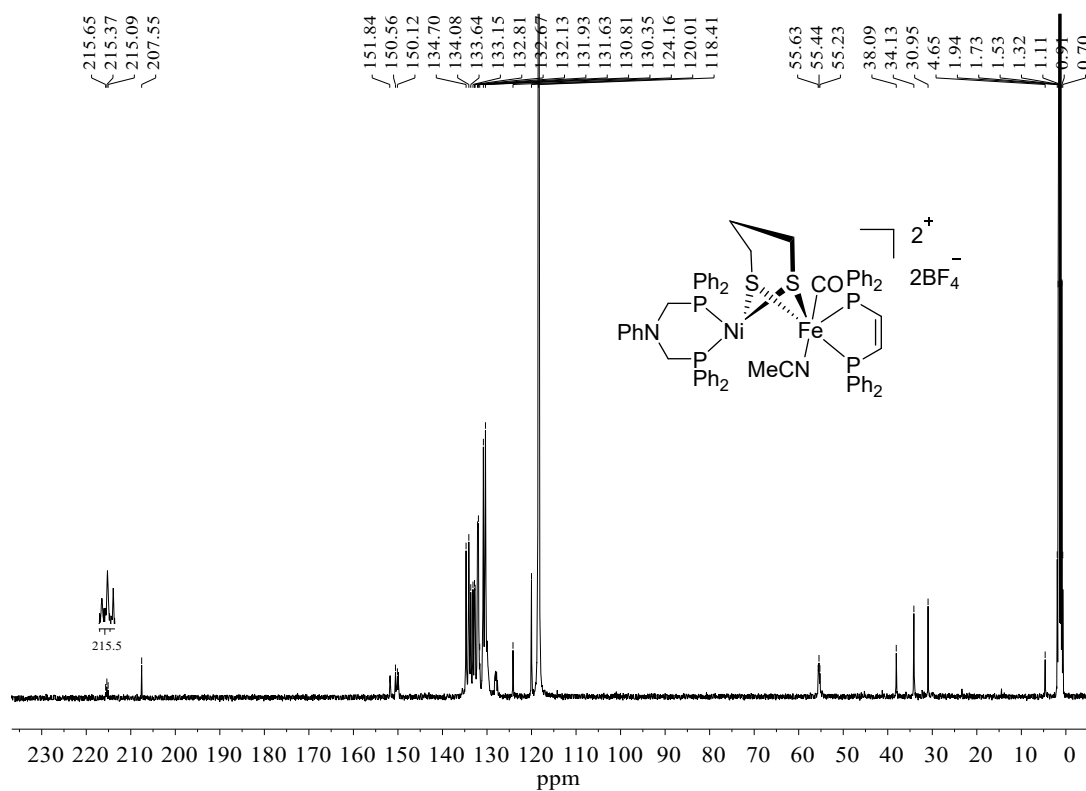

Fig. S44 <sup>13</sup>C NMR spectrum of [9](BF<sub>4</sub>)<sub>2</sub>

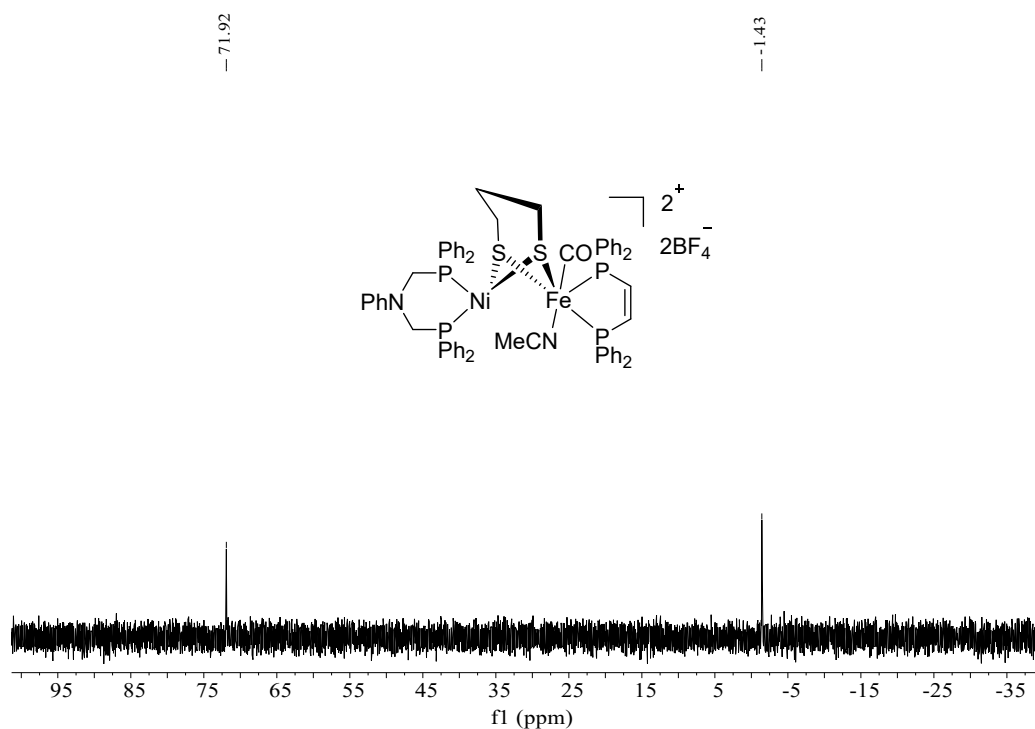

Fig. S45 <sup>31</sup>P NMR spectrum of [9](BF<sub>4</sub>)<sub>2</sub>

## 16. References

- 1 L.-C. Song, X.-F. Han, W. Chen, J.-P. Li and X.-Y. Wang, *Dalton Trans.*, 2017, **46**, 10003-10013.
- 2 L.-C. Song, Y.-X. Wang, X.-K. Xing, S.-D. Ding, L.-D. Zhang, X.-Y. Wang and H.-T. Zhang, *Chem. Eur. J.*, 2016, **22**, 16304-16314.
